# Supplementary material for: Continuous release of SO4˙− over g-C3N4/ZnO/Fe(iii) systems mediated by persulfates: the Fe(iii)/Fe(ii) cycling and degradation pathway
Source: Royal Society of Chemistry journal article supplement (doi:10.1039/d0cy00102c), 2020-01-01
Supplement: d0cy00102c1.pdf [file d0cy00102c1.pdf]

1

## Supporting information

2 **Durable release of  $\text{SO}_4^{2-}$  over g- $\text{C}_3\text{N}_4/\text{ZnO}/\text{Fe(III)}$  system mediated by persulfate:**

3 **Fe(III)/Fe(II) cycling and degradation pathway**

4 **Shaomin Liu<sup>1,2\*</sup>, Jianshu Zhang<sup>1,2</sup>, Meiling Chen<sup>1,2</sup>, Xiaoxiao Wang<sup>1,2</sup>**

5 1Key Laboratory of Safe and Effective Coal Mining (Anhui University of Science and  
6 Technology), Ministry of Education)

7 2School of Earth Science and Environmental Engineering, Anhui University of  
8 Science and Technology, Huainan 232001, PR China

9

10 \*To whom correspondence should be addressed.

11 E-mail addresses: [shmliu1@163.com](mailto:shmliu1@163.com)(S. Liu)

12

13

14 This file includes 1 tables and 4 figures available for further information addressing g-  
15  $\text{C}_3\text{N}_4/\text{ZnO}/\text{PS}/\text{Fe(III)}$  photocatalytic systems parameters, experimental data and other  
16 additional data.

18 **Figure caption:**  
19 **Table.S1 Kinetic fit parameters for RhB degradation by different system**  
20 **Fig.S1 Variation of RhB concentration ( $C/C_0$ ) with reaction time in different**  
21 **system. Reaction conditions: RhB (20 mg/L); PS (2.0 mM); Fe(III) (0.05 mM);**  
22 **Fe(II) 0.05 mM); temperature keep on 25 °C.**  
23 **Fig.S2 (a) Quasi-first-order and (b) Pseudo-second-order kinetic fit of different**  
24 **system for degradation of RhB**  
25 **Fig.S3 The influence of catalyst dosage on the g-C<sub>3</sub>N<sub>4</sub>/ZnO/PS/Fe(III) system.**  
26 **Reaction conditions: visible light (500 W); PS (2.0 mM); Fe(III) (0.05 mM);**  
27 **temperature keep on 25 °C; initial pH 2.9.**  
28 **Fig. S4 The possible reasons for the influence of light intensity on the system**  
29

31

32 **Table.S1 Kinetic fit parameters for RhB degradation by different system**

33

| System                                          | Quasi-first-order kinetic |         | Pseudo-second-order kinetic |         |
|-------------------------------------------------|---------------------------|---------|-----------------------------|---------|
|                                                 | $K_1(\text{min}^{-1})$    | $R_1^2$ | $K_2(\text{min}^{-1})$      | $R_2^2$ |
| PS                                              | 0.00388                   | 0.99944 | 0.00204                     | 0.99892 |
| g-C <sub>3</sub> N <sub>4</sub> /ZnO            | 0.0052                    | 0.98826 | 0.00292                     | 0.99278 |
| g-C <sub>3</sub> N <sub>4</sub> /ZnO/PS         | 0.02084                   | 0.97562 | 0.01527                     | 0.99524 |
| g-C <sub>3</sub> N <sub>4</sub> /ZnO/PS/Fe(III) | 0.03311                   | 0.98182 | 0.03671                     | 0.86956 |

34

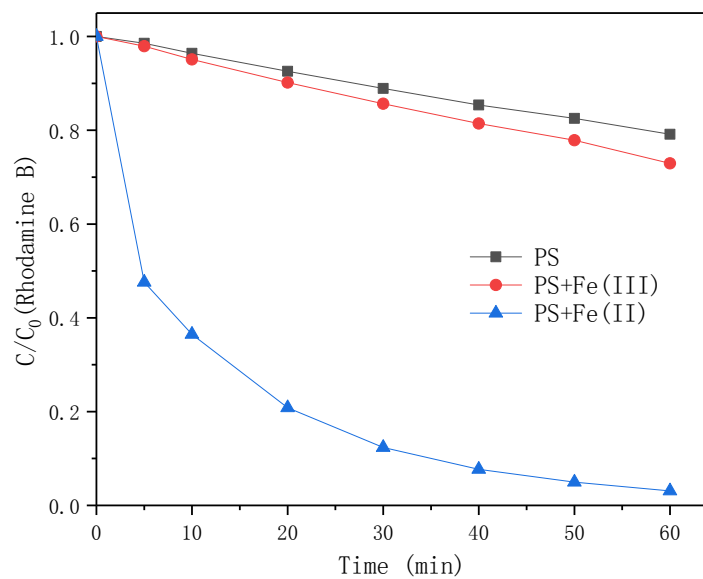

37

38 **Fig.S1 Variation of RhB concentration ( $C/C_0$ ) with reaction time in different**  
39 **system.**

40 **Reaction conditions: RhB (20 mg/L); PS (2.0 mM); Fe(III) (0.05 mM); Fe(II) 0.05**  
41 **mM); temperature keep on 25 °C.**

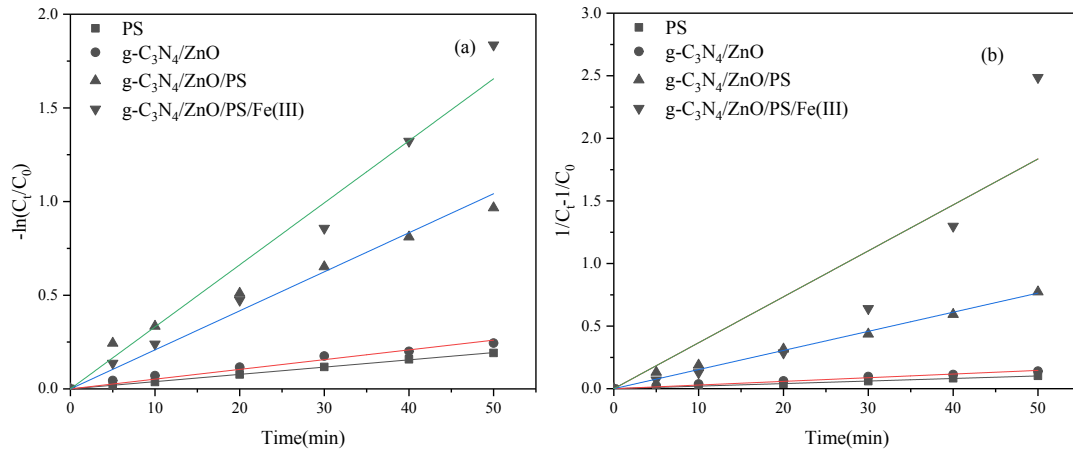

42

43 **Fig.S2 (a) Quasi-first-order and (b) Pseudo-second-order kinetic fit of different**  
 44 **system for degradation of RhB**

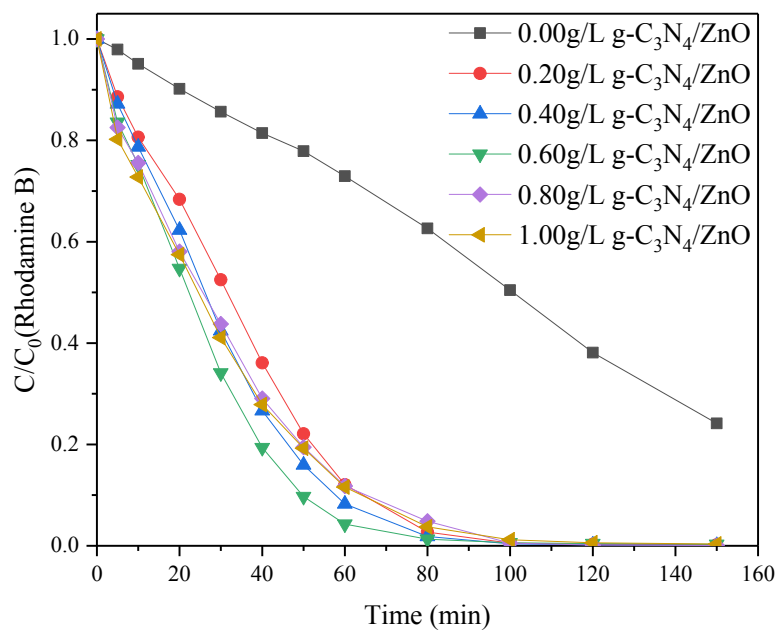

47

48 **Fig.S3** The influence of catalyst dosage on the  $g-C_3N_4/ZnO/PS/Fe(III)$  system. Reaction  
49 conditions: visible light (500 W); PS (2.0 mM); Fe(III) (0.05 mM); temperature keep on 25  
50 °C; initial pH 2.9.

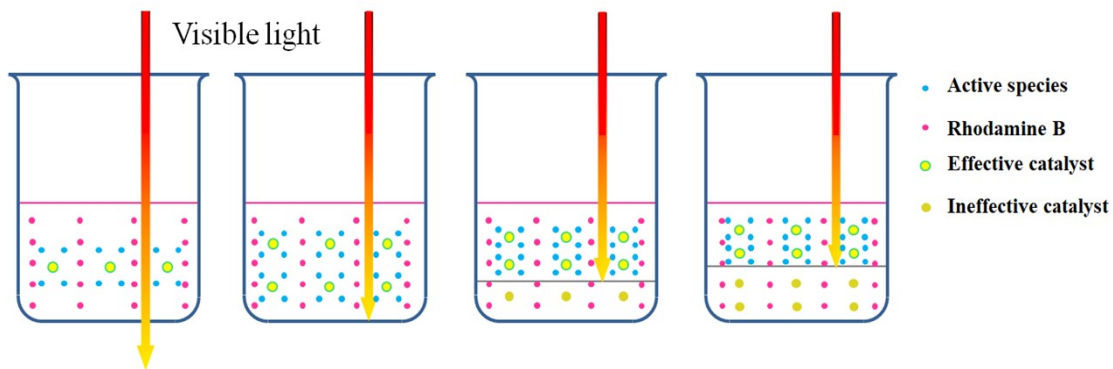

51

52

53 **Fig.S4 The Possible reasons for the influence of light intensity on the system**

54

55
